# Supplementary material
Source: PubMed Central journal article supplement (PMC3690986)

## SUPPLEMENTARY DATA

TABLE S1. List of taxonomically diverse rhizobial strains used to inoculate *Listia angolensis*, *Listia bainesii* and *Listia heterophylla*.

| Strain                 | Identification                            | Original host                 | Geographical origin | Reference/source                |
|------------------------|-------------------------------------------|-------------------------------|---------------------|---------------------------------|
| ORS 571 <sup>T</sup>   | <i>Azorhizobium caulinodans</i>           | <i>Sesbania rostrata</i>      | Senegal             | Dreyfus <i>et al.</i> (1988)    |
| USDA 76 <sup>T</sup>   | <i>Bradyrhizobium elkanii</i>             | <i>Glycine max</i>            | USA                 | Kuykendall <i>et al.</i> (1992) |
| USDA 6 <sup>T</sup>    | <i>Bradyrhizobium japonicum</i>           | <i>Glycine max</i>            | USA                 | Jordan (1982)                   |
| 2281 <sup>T</sup>      | <i>Bradyrhizobium liaongense</i>          | <i>Glycine max</i>            | China               | Xu <i>et al.</i> (1995)         |
| WSM3937                | <i>Burkholderia</i> sp.                   | <i>Rhynchosia ferulifolia</i> | South Africa        | Garau <i>et al.</i> (2009)      |
| WSM5005                | <i>Burkholderia</i> sp.                   | <i>Lebeckia ambigua</i>       | South Africa        | J. Howieson (unpublished data)  |
| TTR 38 <sup>T</sup>    | <i>Ensifer arboris</i>                    | <i>Prosopis chilensis</i>     | Sudan               | Nick <i>et al.</i> (1999)       |
| NGR234                 | <i>Ensifer fredii</i>                     | <i>Lablab purpureus</i>       | New Guinea          | Trinick (1980)                  |
| WSM419                 | <i>Ensifer medicae</i>                    | <i>Medicago murex</i>         | Sardinia            | Howieson and Ewing (1986)       |
| Sm1021                 | <i>Ensifer meliloti</i>                   | <i>Medicago sativa</i>        | Australia           | Meade <i>et al.</i> (1982)      |
| ORS 609 <sup>T</sup>   | <i>Ensifer saheli</i>                     | <i>Sesbania cannabina</i>     | Senegal             | De Lajudie <i>et al.</i> (1994) |
| ORS 1009 <sup>T</sup>  | <i>Ensifer teranga</i>                    | <i>Acacia laeta</i>           | Senegal             | De Lajudie <i>et al.</i> (1994) |
| ORS 2060 <sup>T</sup>  | <i>Methylobacterium nodulans</i>          | <i>Crotalaria podocarpa</i>   | Senegal             | Sy <i>et al.</i> (2001)         |
| Lut6 <sup>T</sup>      | <i>Microvirga lupini</i>                  | <i>Lupinus texensis</i>       | USA                 | Andam and Parker (2007)         |
| ORS 992 <sup>T</sup>   | <i>Rhizobium (Allorhizobium) undicola</i> | <i>Neptunia natans</i>        | Senegal             | De Lajudie <i>et al.</i> (1998) |
| <b>Control strains</b> |                                           |                               |                     |                                 |
| WSM2598                | <i>Methylobacterium</i> sp.               | <i>Listia bainesii</i>        | South Africa        | Yates <i>et al.</i> (2007)      |
| WSM3557 <sup>T</sup>   | <i>Microvirga lotononidis</i>             | <i>Listia angolensis</i>      | Zambia              | Ardley <i>et al.</i> (2012)     |

<sup>T</sup> = Type strain

TABLE S2 Ability of rhizobial strains isolated from *Leobordea* and *Lotononis s.s.* species to nodulate a range of *Lotononis s.l.* hosts. Nodulation is highlighted in bold.

| Isolate                           | Original host                           | Nodulation of <i>Lotononis s.l.</i> (section) host |                                              |                                           |                                        |                                    |
|-----------------------------------|-----------------------------------------|----------------------------------------------------|----------------------------------------------|-------------------------------------------|----------------------------------------|------------------------------------|
|                                   |                                         | <i>Leobordea mollis</i><br>(Leptis)                | <i>Leobordea polycephala</i><br>(Synclistus) | <i>Leobordea pungens</i><br>(Cleistogama) | <i>Lotononis delicata</i><br>(Oxydium) | <i>Lotononis laxa</i><br>(Oxydium) |
| <i>Bradyrhizobium</i> spp.        |                                         |                                                    |                                              |                                           |                                        |                                    |
| WSM2596                           | <i>Leobordea foliosa</i><br>(Lipozygis) | N–                                                 | <b>N+F+</b>                                  | N–                                        | <b>N+F–</b>                            | N–                                 |
| WSM2632                           | <i>Lotononis s. l.</i> sp.              | ND                                                 | <b>N+F+</b>                                  | <b>N+F–</b>                               | <b>N+F–</b>                            | ND                                 |
| WSM2783                           | <i>Lotononis s. l.</i> sp.              | N–                                                 | <b>N+F+</b>                                  | <b>N+F–</b>                               | <b>N+F+</b>                            | N–                                 |
| <i>Ensifer meliloti</i>           |                                         |                                                    |                                              |                                           |                                        |                                    |
| WSM2653                           | <i>Lotononis s. l.</i> sp.              | <b>N+F–</b>                                        | N–                                           | <b>N+F+</b>                               | N–                                     | <b>N+F–</b>                        |
| WSM3040                           | <i>Lotononis laxa</i><br>(Oxydium)      | <b>N+F–</b>                                        | N–                                           | <b>N+F+</b>                               | N–                                     | N–                                 |
| <i>Mesorhizobium tianshanense</i> |                                         |                                                    |                                              |                                           |                                        |                                    |
| WSM2624                           | <i>Lotononis s. l.</i> sp.              | <b>N+F–</b>                                        | N–                                           | N–                                        | N–                                     | N–                                 |
| <i>Methylobacterium nodulans</i>  |                                         |                                                    |                                              |                                           |                                        |                                    |
| WSM2667                           | <i>Leobordea calycina</i><br>(Leptis)   | <b>N+F+</b>                                        | N–                                           | N–                                        | <b>N+F–</b>                            | N–                                 |

N+F+ = nodulation and nitrogen fixation; N+F– = nodulation, but no nitrogen fixation; N– = no nodulation, ND = not determined.

FIG. S1a–h. Symbiotic ability of rhizobia associated with *Lotononis s.l.* on taxonomically diverse *Lotononis s.l.* hosts, assessed by nodule number (■) and dry weight of shoots (■) of plants harvested after 10 weeks growth.

a) *Listia angolensis*

b) *Listia bainesii*

c) *Leobordea bolusii*

d) *Leobordea longiflora*

e) *Leobordea platycarpa* (i) and (ii). The graph has been rescaled in (ii) by removing the N+ treatment to reveal the rhizobial inoculant response. Non-nodulated plants were removed from the WSM3557<sup>T</sup> treatment data.

f) *Leobordea stipulosa* (i) and (ii). There is no uninoculated control, due to seedling death. The graph has been rescaled in (ii) by removing the N+ treatment to reveal the rhizobial inoculant response.

g) *Lotononis crumanina* (i) and (ii). The graph has been rescaled in (ii) by removing the N+ treatment to reveal the rhizobial inoculant response.

h) *Lotononis falcata* (i) and (ii). The graph has been rescaled in (ii) by removing the N+ treatment to reveal the rhizobial inoculant response.

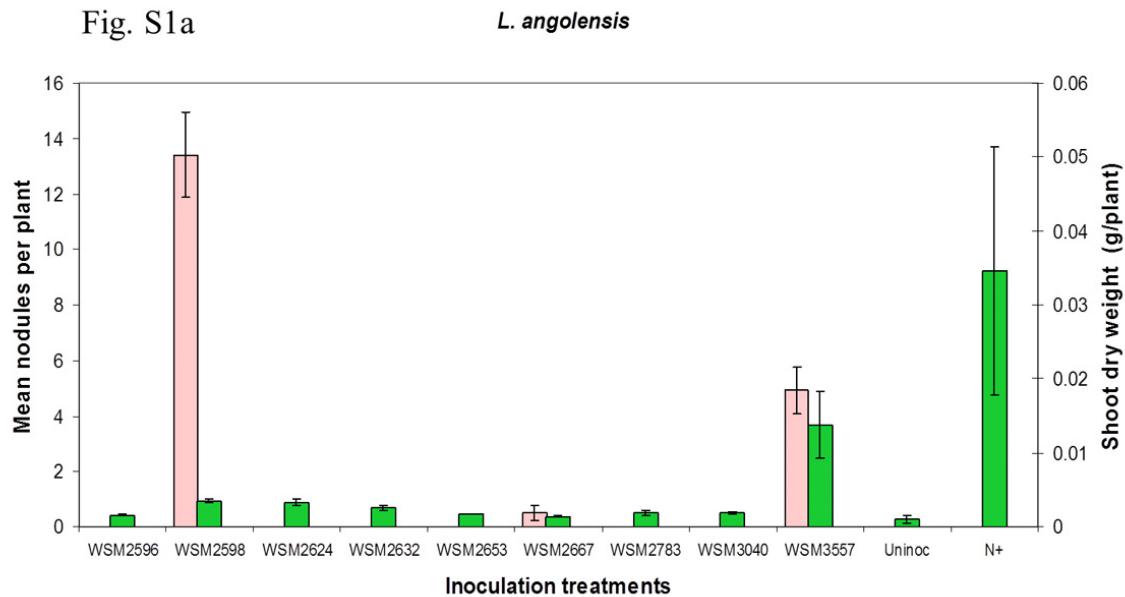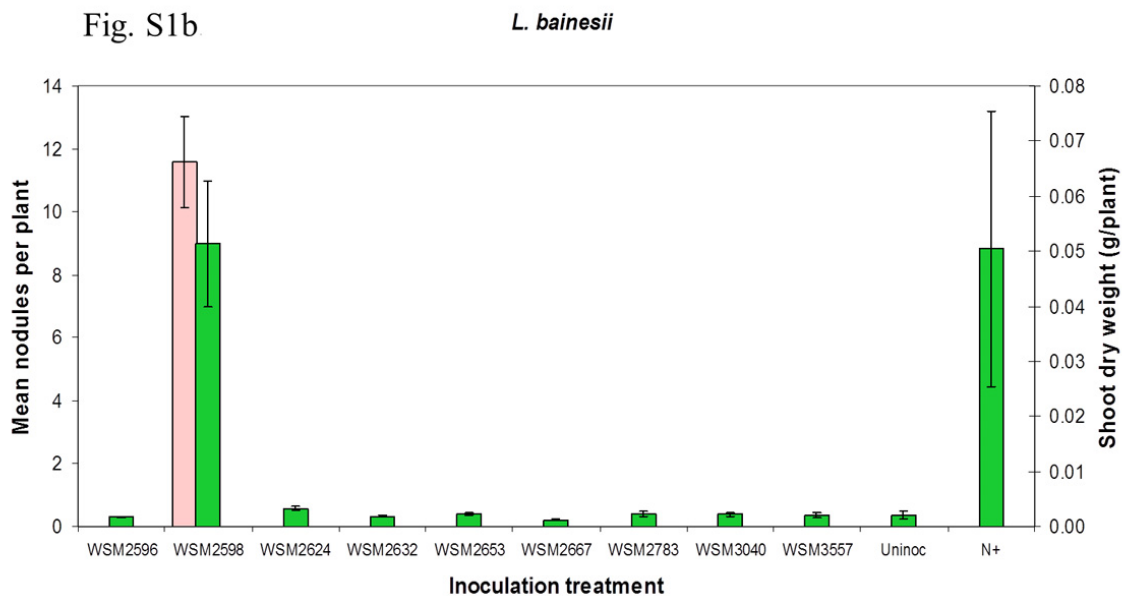

Fig. S1c

*L. bolusii*

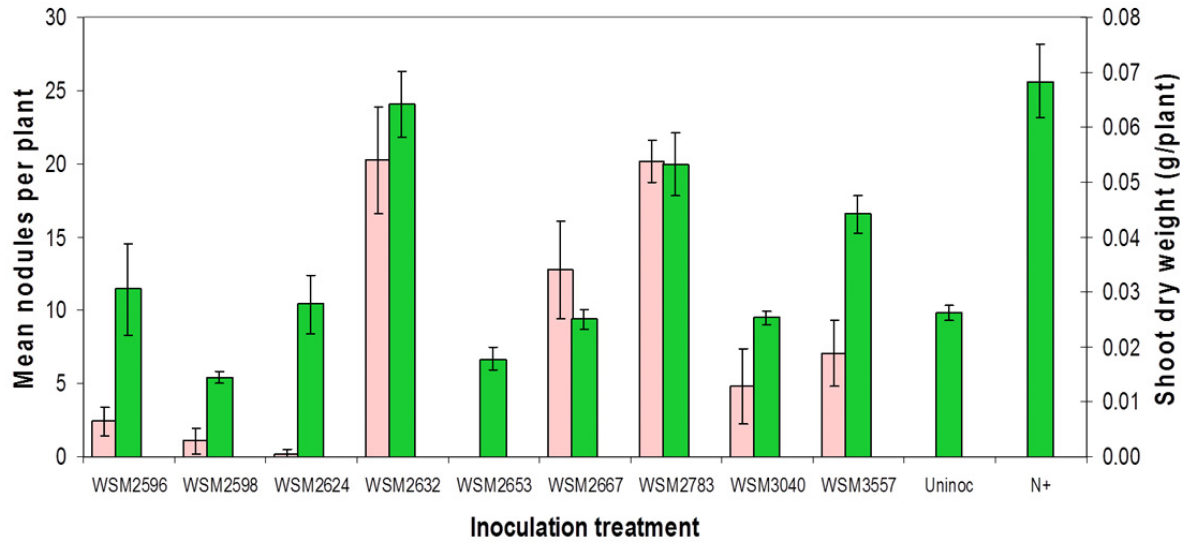

Fig. S1d

*L. longiflora*

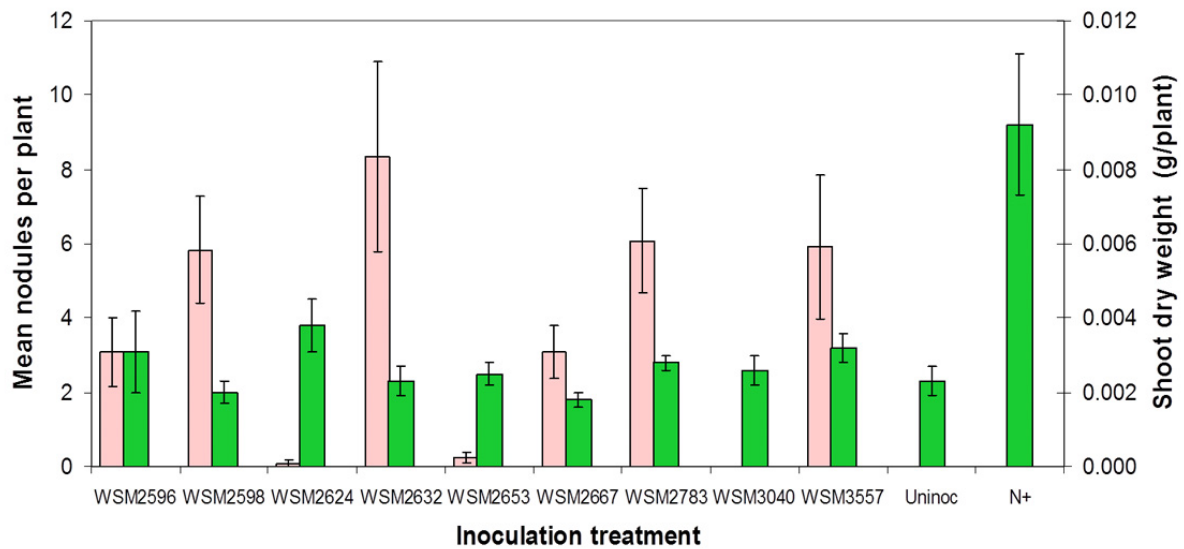

Fig. S1e (i)

*L. platycarpa*

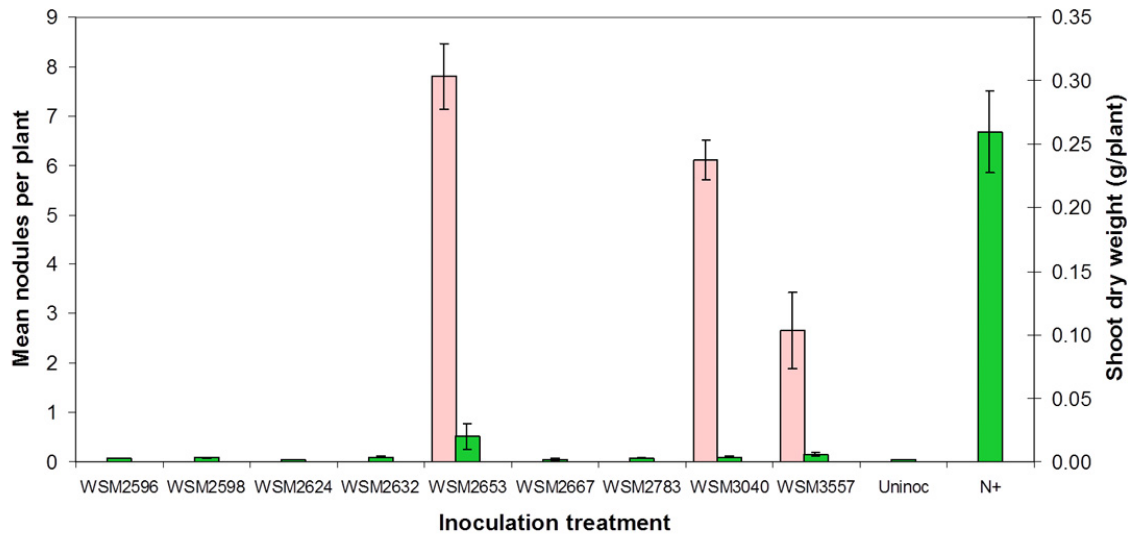

Fig. S1e (ii)

*L. platycarpa* nodulated WSM3557 minus N+

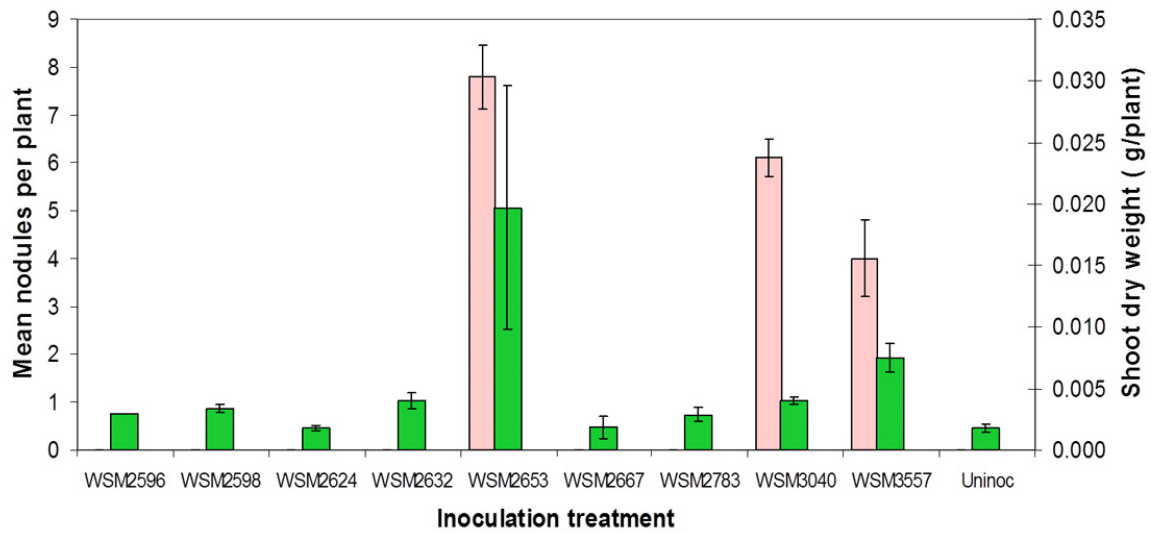

Fig. S1f (i)

*L. stipulosa*

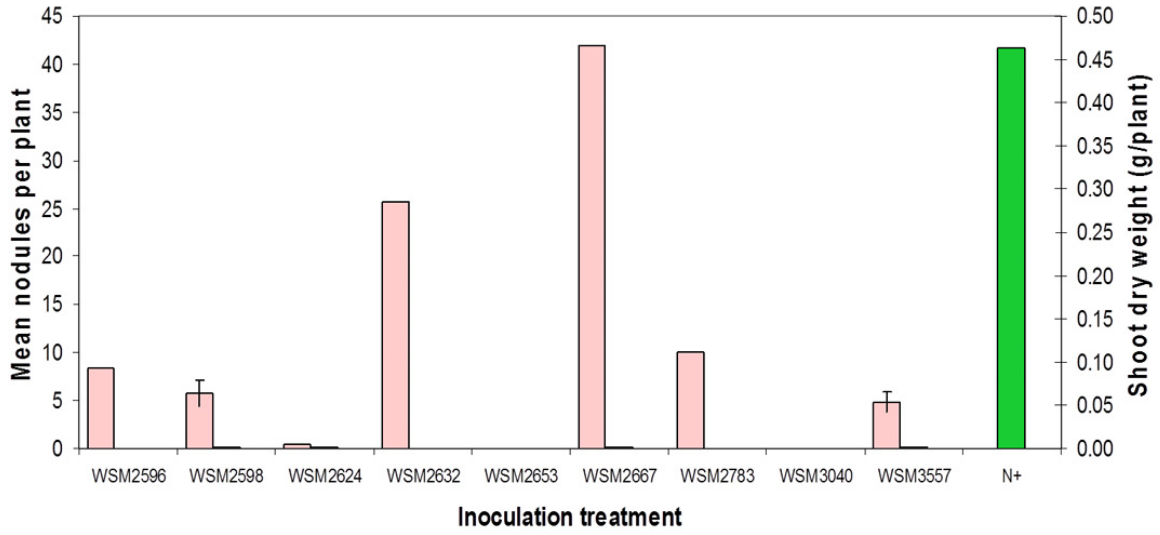

Fig. S1f (ii)

*L. stipulosa* minus N+

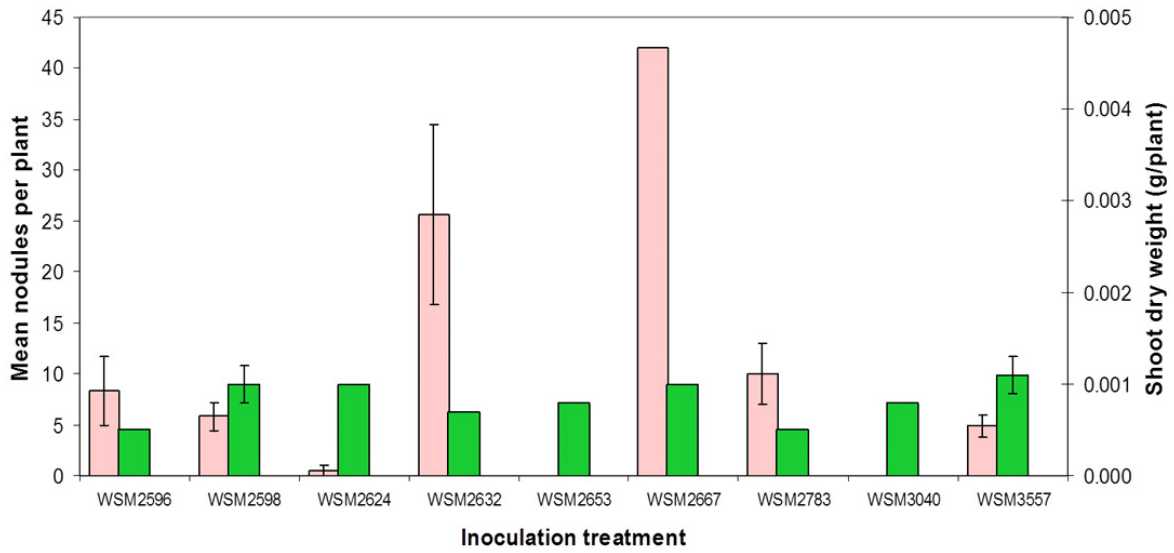

Fig. S1g (i)

*L. crumanina*

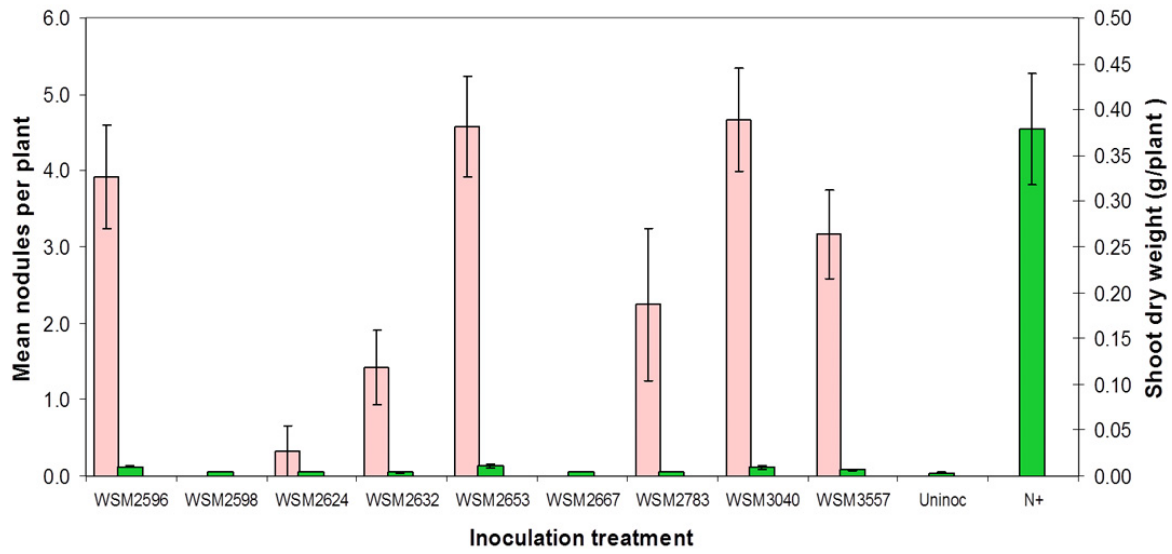

Fig. S1g (ii)

*L. crumanina* minus N+ control

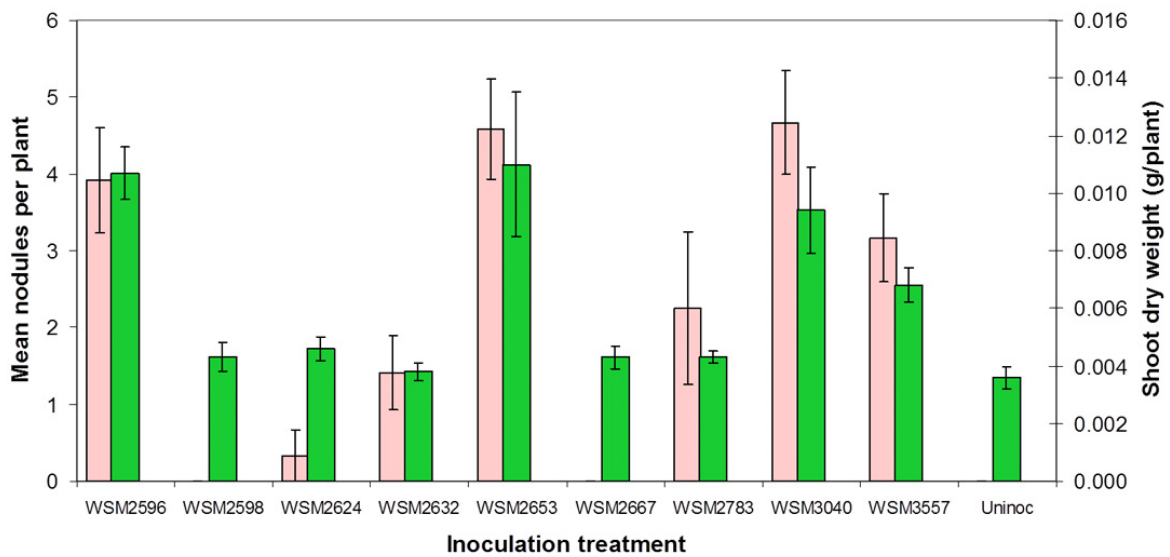

Fig. S1h (i)

*L. falcata*

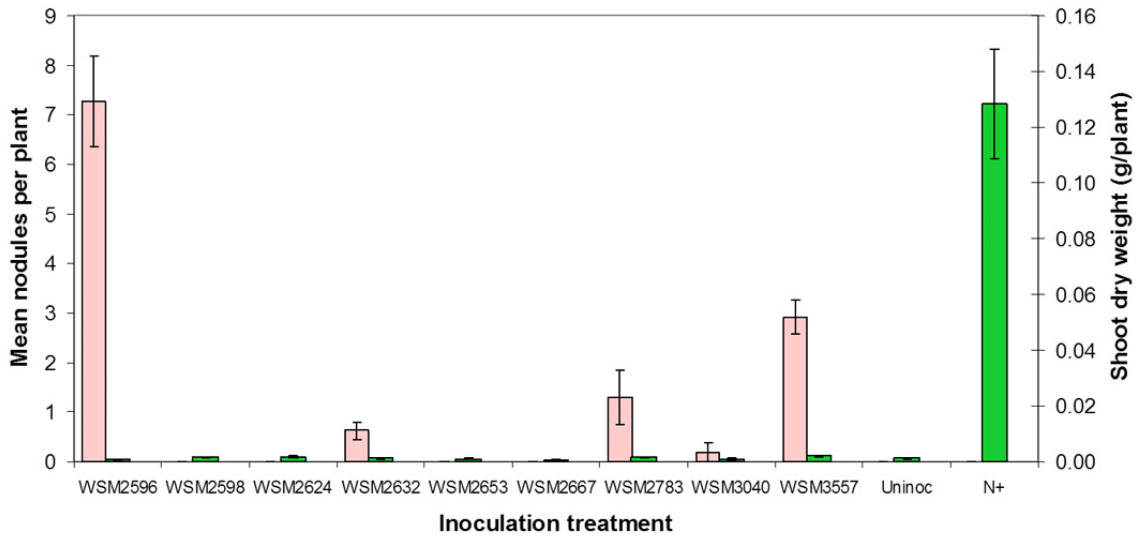

Fig. S1h (ii)

*L. falcata* minus N+

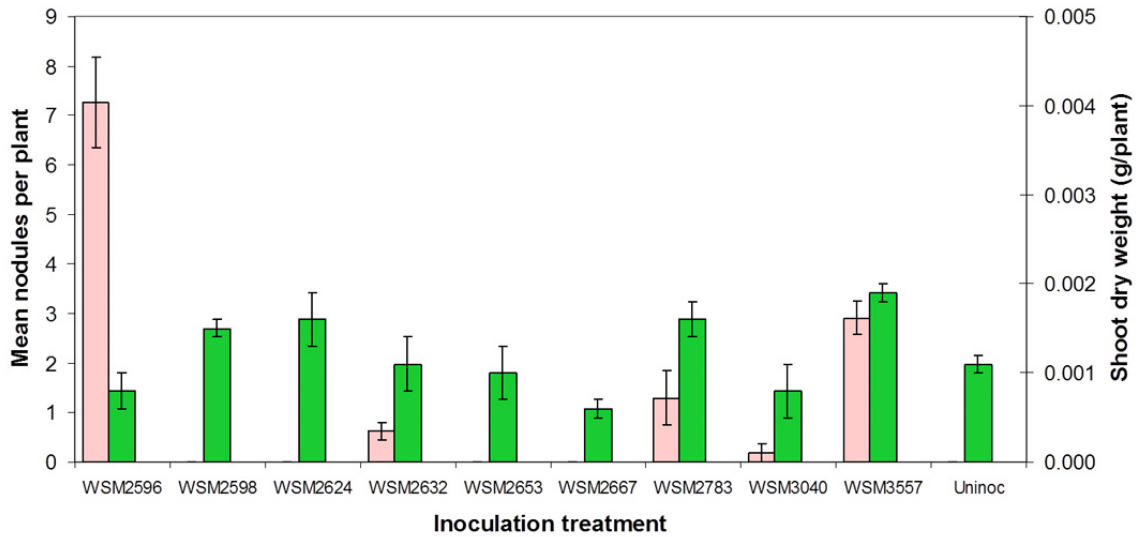

Supplement: supp_mct095_mct095supp.pdf [file supp_mct095_mct095supp.pdf]
